# Supplementary material for: The Dual-Mode Transition of Myofibroblasts Derived from Hepatic Stellate Cells in Liver Fibrosis
Source: MDPI journal article supplement (doi:10.3390/ijms242015460), 2023-10-23
Supplement: s1 [file s1]

# Supplementary Materials

This file includes:

Figure S1-3, Tables S1

Fig.S1

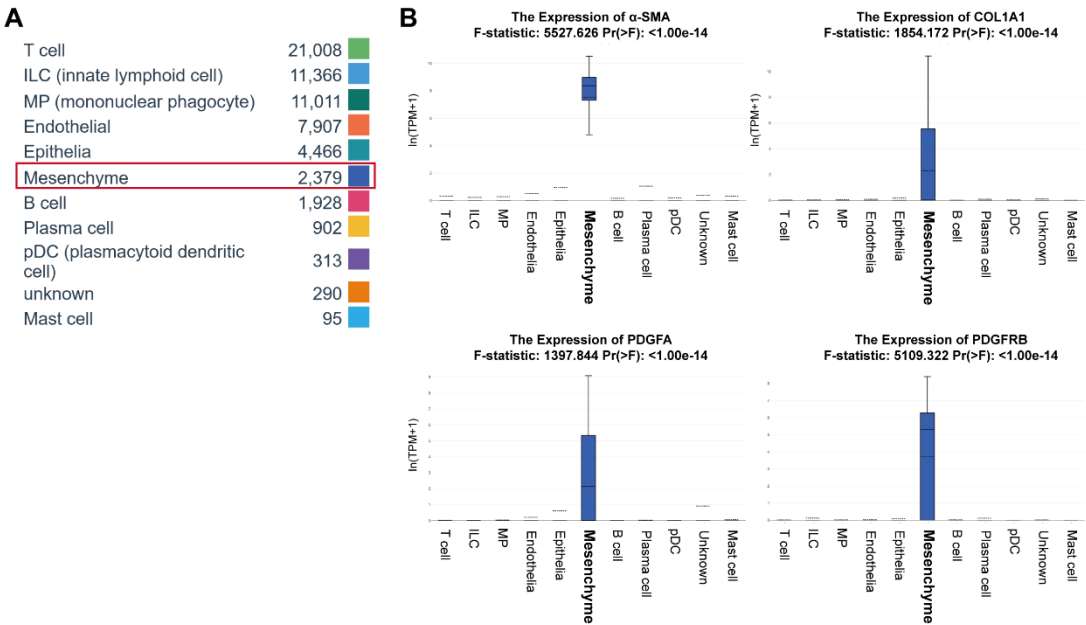

**Figure S1. Cell subpopulation with myofibroblast characteristics in the single cell assay database.** **A.** Classification of cell subpopulations in the Homo sapiens fibrosis liver single-cell database. **B.** The  $\alpha$ -SMA, COL1A1, PDGFA, and PDGFRB expression in cell subpopulations in a single cell database.

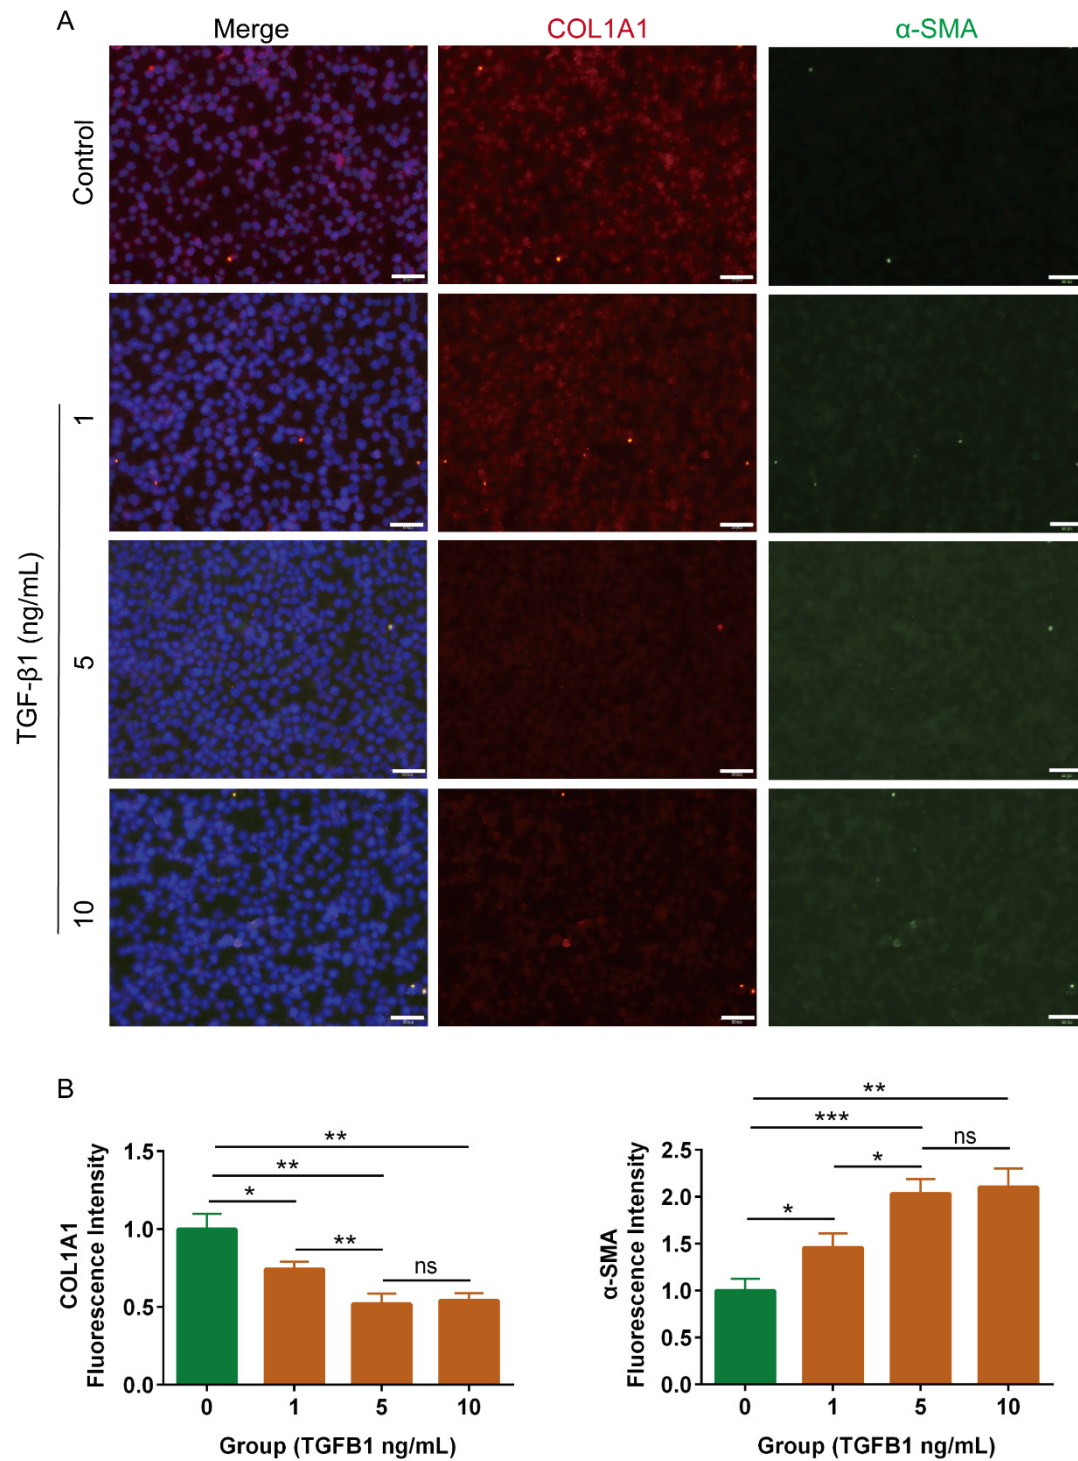

**Figure S2. The protein expression of  $\alpha$ -SMA in HSC-T6 derived myofibroblasts in the presence of gradient TGF- $\beta$ 1.** A. The expression of  $\alpha$ -SMA (green) and COL1A1 (red) in HSCs derived myofibroblasts was labeled with double staining; scale bar, 50  $\mu$ m. B. Fluorescence intensity quantification; Image J was used for

quantification. t-tests were used for statistical analysis. \*P<0.05; \*\*P<0.01;

\*\*\*P<0.001.

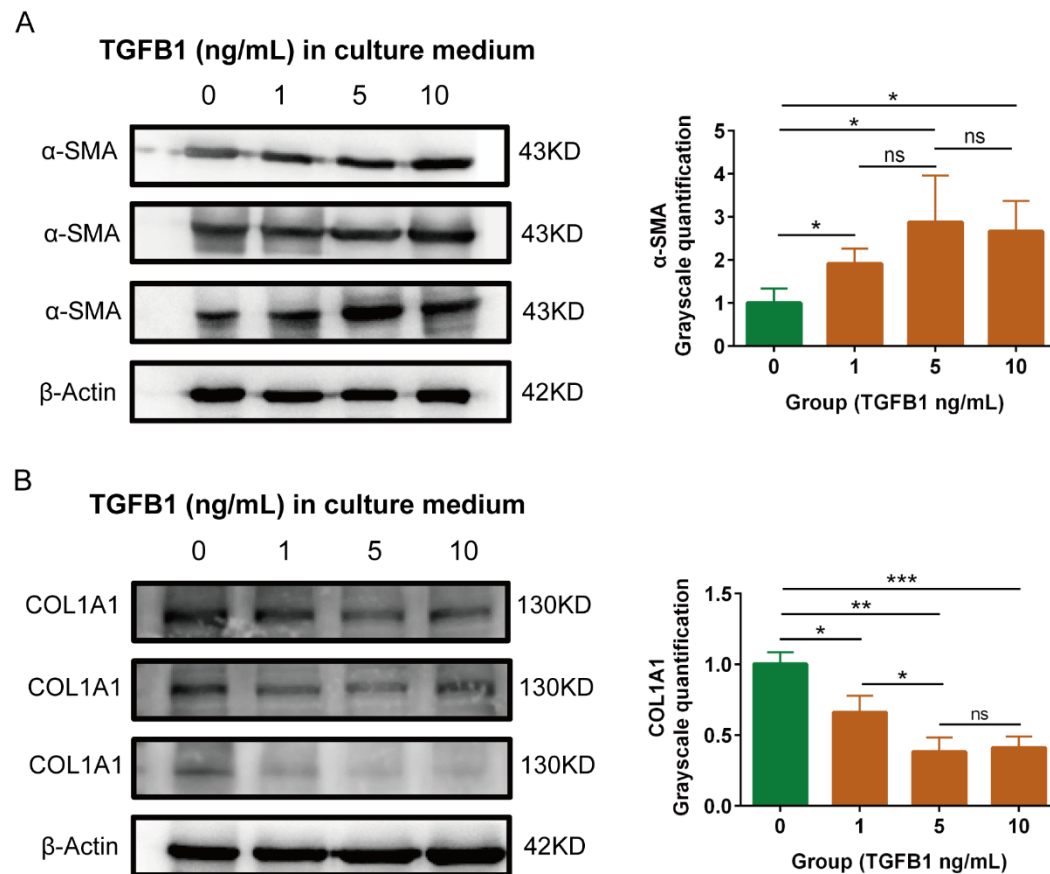

**Figure S3. Cell subpopulation with myofibroblast characteristics in the single cell**

**assay database. A.** The protein expression of  $\alpha$ -SMA in HSC-T6 derived myofibroblasts in the presence of gradient TGF- $\beta$ 1; The results of three independent experiments were presented; Image J was used for grayscale quantification. **B.** The protein expression of COL1A1 in HSC-T6 derived myofibroblasts in the presence of gradient TGF- $\beta$ 1; The results of three independent experiments were presented; Image J was used for grayscale quantification. t-tests were used for statistical analysis.

\*P<0.05; \*\*P<0.01; \*\*\*P<0.001.

**Table I. Primers for qPCR**

| <b>Name</b>                     | <b>FOR</b>           | <b>REV</b>           |
|---------------------------------|----------------------|----------------------|
| <b><math>\alpha</math>-SMA</b>  | GCTATTCAGGCTGTGCTGTC | GGTAGTCGGTGAGATCTCGG |
| <b>COL1A1</b>                   | CATGCCGTGACCTCAAGATG | TCCATCGGTCATGCTCTCTC |
| <b><math>\beta</math>-actin</b> | TGTGTTGTCCCTGTATGCCT | AATGTCACGCACGATTTC   |
